# Supplementary material
Source: MDPI journal article supplement (https://www.mdpi.com/2571-9408/6/3/153)
Supplement: s1 [file s1]

## SUPPLEMENTARY MATERIALS

### Article

### Geo-environmental assessment of tourist development and its impact on sustainability.

### Supplementary Materials:

Table S1 lists the experts who carried out the environmental evaluation of geosites. In addition, there is a brief description of each evaluator and a web address to their academic profile.

**Table S1.** Experts involved in the cause-effect geo-environmental assessment matrix.

| N.- | Evaluator                 | Academic profile                                                                                                                                                                                                                                                                                                                                                                                                                                                                                                                                                                                                                                     | Link                                                                                      |
|-----|---------------------------|------------------------------------------------------------------------------------------------------------------------------------------------------------------------------------------------------------------------------------------------------------------------------------------------------------------------------------------------------------------------------------------------------------------------------------------------------------------------------------------------------------------------------------------------------------------------------------------------------------------------------------------------------|-------------------------------------------------------------------------------------------|
| 1   | Paúl Carrión Mero         | Paúl Carrión-Mero is Director of the Center for Research and Projects Applied to Earth Sciences (CIPAT) of ESPOL and has more than 120 publications, 8 of them editions and book authorship, as well as more than 30 research projects and around 5 dozen service/consulting projects. He received his PhD in Mining Engineering, specialty in Hydrogeology and Environment from the Polytechnic University of Madrid, Spain. He teaches postgraduate courses in Ecuador, Guatemala, and Honduras. Additionally, he is Principal Professor of ESPOL for more than 23 years.                                                                          | <a href="https://orcid.org/0000-0002-9747-7547">https://orcid.org/0000-0002-9747-7547</a> |
| 2   | Fernando Morante Carballo | Fernando Morante-Carballo is research coordinator of the Center for Research and Projects Applied to Earth Sciences (CIPAT) of ESPOL and professor in the Faculty of Natural Sciences and Mathematics. Has more than 60 publications, 4 of them editions and book authorship, as well as more than 20 research projects and around 2 dozen service/consulting projects. He received his PhD in Geology Engineering, specialty in Mining, Environment and Natural Zeolites from the Polytechnic University of Madrid, Spain. He is Principal Professor of ESPOL for more than 15 years.                                                               | <a href="https://orcid.org/0000-0003-0374-0306">https://orcid.org/0000-0003-0374-0306</a> |
| 3   | Gricelda Herrera Franco   | Gricelda Herrera-Franco is a teacher and research of the Faculty of Engineering Sciences of the Universidad de la Península de Santa Elena (UPSE), she has a doctorate in Geographical Engineering from the Universidad Politécnica de Madrid. She works on natural resources, geoparks and sustainable development projects. It is part of the CYTED International Water Sowing and Harvesting Network.                                                                                                                                                                                                                                             | <a href="https://orcid.org/0000-0001-9558-6099">https://orcid.org/0000-0001-9558-6099</a> |
| 4   | Bethy Merchán Sanmartín   | Bethy Merchán-Sanmartín is a researcher at the Center for Research and Projects Applied to Earth Sciences (CIPAT – ESPOL). She obtained her degree in civil engineering at ESPOL University and completed her master's degree at the Ecole Nationale du Genie de l'Eau et de l'Environnement de Strasbourg -ENGINES- France, in the field of water and sanitation. She worked in different public and private institutions such as INTERAGUA, MIDUVI, and SENAGUA. Her lines of research are sustainability, circular economy, liquid, and solid waste, wastewater treatment, activated sludge, environment, geotourism, monitoring, management, and | <a href="https://orcid.org/0000-0001-5103-0355">https://orcid.org/0000-0001-5103-0355</a> |

|   |                      |                                                                                                                                                                                                                                                                                                                                                                                                                                                 |                                                                                           |
|---|----------------------|-------------------------------------------------------------------------------------------------------------------------------------------------------------------------------------------------------------------------------------------------------------------------------------------------------------------------------------------------------------------------------------------------------------------------------------------------|-------------------------------------------------------------------------------------------|
|   |                      | renewable energy. She has been a full-time professor at ESPOL for six years.                                                                                                                                                                                                                                                                                                                                                                    |                                                                                           |
| 5 | Lady Soto Navarrete  | Lady Soto – Navarrete, is an M.Sc in Social Sciences with a mention in Socio-environmental studies and belongs to the Marine and Coastal Tourism Research Group at ESPOL University and is completing her doctoral studies in Tourism and Leisure, in the line of research Tourism, local development, and sustainability at the Rovira i Virgili University. Is currently working on issues related to the sustainable development of tourism. | <a href="https://orcid.org/0000-0002-4761-4531">https://orcid.org/0000-0002-4761-4531</a> |
| 6 | Fred Taranto Moreira | Fred Taranto-Moreira is an Environmental Management Engineer and junior researcher at the Quevedo State Technical University. He works on issues of conservation and environmental care related to sustainable development and bibliometric research.                                                                                                                                                                                           | <a href="https://scipfiles.com/profile/2756293">https://scipfiles.com/profile/2756293</a> |
| 7 | Boris Apolo Masache  | Geological Engineer graduated from the ESPOL Polytechnic University. He is a technical assistant and researcher at the ESPOL Water and Sanitation Center (CADS). He has participated in two projects related to water resources and has experience in research in geosciences issues related to geoheritage and bibliometrics.                                                                                                                  | <a href="https://orcid.org/0000-0002-1767-3987">https://orcid.org/0000-0002-1767-3987</a> |

Table S2 shows the evaluation aspects identified in the field by the evaluators. In this table is each aspect with its brief description for a better understanding of the evaluation:

**Table S2.** Description of the aspects identified in situ.

| N.- | Aspects                              | Description                                                                                                                                                                                                                                                                                                                                        | References |
|-----|--------------------------------------|----------------------------------------------------------------------------------------------------------------------------------------------------------------------------------------------------------------------------------------------------------------------------------------------------------------------------------------------------|------------|
| 1   | Gas emission perception              | Gas emissions cause environmental problems such as the alteration of the carbon cycle, through the emissions of carbon dioxide (CO <sub>2</sub> ) and methane (CH <sub>4</sub> ), in addition to the modification of the nitrogen, phosphorus and sulfur cycle, negatively impacting the land cover modification, climate change and human health. | [115,116]  |
| 2   | Soil quality perception              | Soil is a vital natural resource that performs environmental, economic and social functions. It is directly related to food security, health and economic and social sustainability. The main threats to the soil may be erosion, decreased organic matter content and bio-diversity, pollution, compaction and landslides.                        | [117,118]  |
| 3   | Electricity consumption              | The increase in the consumption of electrical energy affects the environment, accelerating the emission of greenhouse gases because, in Ecuador, its origin is not entirely renewable.                                                                                                                                                             | [119]      |
| 4   | Bad odours perception                | Bad odours affect health and, in the same way, general well-being, due to the discomfort they generate, both inside the place and in external areas.                                                                                                                                                                                               | [118]      |
| 5   | Noise and vibration perception       | Different studies have determined that noise and vibrations are detrimental to cardiovascular function in people exposed to high levels.                                                                                                                                                                                                           | [120,121]  |
| 6   | Generation or presence of wastewater | Wastewater contains many pollutants, such as biochemical oxygen demand and high nitrogen and phosphorus concentrations. Also, numerous varieties of bacteria and viruses are pathogenic to humans.                                                                                                                                                 | [122]      |
| 7   | Fauna                                | Wildlife is a fundamental component of biodiversity and ecosystems. It constitutes an important factor in its ecological function and cultural significance for human societies, improving                                                                                                                                                         | [123,124]  |

|    |                                      |                                                                                                                                                                                                                                                                      |           |
|----|--------------------------------------|----------------------------------------------------------------------------------------------------------------------------------------------------------------------------------------------------------------------------------------------------------------------|-----------|
|    |                                      | natural settings, ecotourism activities and disease control with a positive impact on public health.                                                                                                                                                                 |           |
| 8  | Flora                                | The presence of flora in any region of the world is key to the hydrological cycle in aspects such as water storage and release during evapotranspiration, radiation balance and wind dynamics. All of these elements contribute to the climate of a region.          | [125]     |
| 9  | Construction for geosite adjustments | They are strategies aimed at conserving and maintaining an environment, promoting education in Earth Sciences and promoting sustainable economic development at the local level.                                                                                     | [126]     |
| 10 | Reforestation                        | It is an important initiative in areas with low vegetation, especially in urban areas. Is a natural tool that helps to improve the daily life of the city through the mitigation of climate change, carbon capture and as potential tourist attractions in geosites. | [127,128] |
| 11 | Organic waste generation             | The presence of organic waste in certain areas generates bacteria and microorganisms that pollute the soil, water and air, affecting the ecosystem.                                                                                                                  | [118,129] |
| 12 | Inorganic waste generation           | The accumulation of inorganic residues produces microbiological contamination, which causes potential risks to public health.                                                                                                                                        | [130]     |
| 13 | Hazardous waste generation           | Hazardous waste can be any substance with hazardous properties such as toxicity, flammability, reactivity, and corrosivity. Therefore, it is causing a risk to humans and the environment.                                                                           | [131]     |
| 14 | Loss of vegetation cover             | It affects the productivity of ecosystems through loss of habitat, biomass and carbon storage, increasing the temperature of the earth's surface and global warming.                                                                                                 | [132,133] |
| 15 | Industrial activity                  | Due to intense energy consumption, industrial activities are the main contributor to greenhouse gas emissions.                                                                                                                                                       | [134]     |
| 16 | Commercial activities                | Commercial activities are successful public spaces for the city, increasing tourism and economic investment, contributing to citizens' health and quality of life.                                                                                                   | [135]     |
| 17 | Employment generation                | The generation of employment in tourist sites can be beneficial due to its economic development and sustainability in the site, city or region.                                                                                                                      | [136]     |
| 18 | Service generation                   | Promotes marketing to generate economic benefits through its enhancement as a tourist attraction. It encourages visitors to conserve and preserve these areas and similar urban or rural spaces.                                                                     | [137]     |
| 19 | Visual or landscape aspect           | The landscape is a visual factor that is important in assessing and conditioning the basic infrastructures for the enjoyment of the destinations, establishing tourist routes to allow the contemplation of the environment from a strategic point of view.          | [138]     |
| 20 | Social recreation                    | It implies an exclusive and small number of activities that must be carried out for the good use of free time, presented in a pleasant and fun way, stimulating the visit of tourists.                                                                               | [139]     |
| 21 | Tourist capacity                     | It determines the optimal number of people for the use of the resource or service, maintaining the equilibrium condition of the natural system, without any changes in its initial characteristics.                                                                  | [140]     |
| 22 | Tourist safety                       | The importance of the experience, dedication and capacity of the staff provide security that helps tourists to make connections with the environment through tourism.                                                                                                | [141]     |

|    |                                               |                                                                                                                                                                                                                         |       |
|----|-----------------------------------------------|-------------------------------------------------------------------------------------------------------------------------------------------------------------------------------------------------------------------------|-------|
| 23 | Symbol or figure cultural                     | They are tangible or intangible tourist attractions or tourist resources that motivate the temporary displacement of travelers. They can be archaeological sites, pre-Hispanic art, colonial art and traditions.        | [142] |
| 24 | Presence of vehicles (transport or machinery) | The presence of vehicles has become a major source of air pollution in the world. Vehicles are the main contributors emitting more than 90% of NO <sub>x</sub> and particulate matter, as well as 80% of carbohydrates. | [143] |

## References

115. Ayuso Siart, S. ¿Cómo Contabilizar El Impacto Ambiental de las Empresas? El Caso de las Emisiones de Gases de Efecto Invernadero. *Rev. Estud. Empres. Segunda Época* **2020**, *2*, 94–111, doi:10.17561/ree.v2020n2.6.
116. Martin, E.W.; Shaheen, S.A. Greenhouse Gas Emission Impacts of Carsharing in North America. **2011**, *12*, 1074–1086.
117. Vrščaj, B.; Poggio, L.; Marsan, F.A. A Method for Soil Environmental Quality Evaluation for Management and Planning in Urban Areas. *Landsc. Urban Plan.* **2008**, *88*, 81–94, doi:10.1016/j.landurbplan.2008.08.005.
118. Takata, M.; Fukushima, K.; Kino-Kimata, N.; Nagao, N.; Niwa, C.; Toda, T. The Effects of Recycling Loops in Food Waste Management in Japan: Based on the Environmental and Economic Evaluation of Food Recycling. *Sci. Total Environ.* **2012**, *432*, 309–317, doi:10.1016/j.scitotenv.2012.05.049.
119. Jara, N.G.; Reinoso, F.Z.; Isaza-roldán, C.; Espinoza, J.L. Impacts on the Consumption of Electric Power by the Use of Efficient Refrigerators - Ecuador Case Impactos En El Consumo de Energía Eléctrica Por El Uso de Refrigeradores Eficientes - Caso Ecuador. *Ingenius* **2017**, 53–63.
120. Unión Europea Libro Blanco “La Política Europea de Transportes de Cara Al 2010: La Hora de la Verdad”; 2002; ISBN 9289403373.
121. Croy, I.; Smith, M.G.; Waye, K.P. Effects of Train Noise and Vibration on Human Heart Rate during Sleep: An Experimental Study. *BMJ Open* **2013**, *3*, 1–9, doi:10.1136/bmjopen-2013-002655.
122. Mallin, M.A.; Cahoon, L.B.; Toothman, B.R.; Parsons, D.C.; McIver, M.R.; Ortwine, M.L.; Harrington, R.N. Impacts of a Raw Sewage Spill on Water and Sediment Quality in an Urbanized Estuary. *Mar. Pollut. Bull.* **2007**, *54*, 81–88, doi:10.1016/j.marpolbul.2006.09.003.
123. Ulloa, J. ¿ Por Qué Debemos Conservar la Fauna Silvestre ? **2012**, *8*, 66–69.
124. Mittermeier, R.A.; Mittermeier, C.G.; Brooks, T.M.; Pilgrim, J.D.; Konstant, W.R.; Fonseca, G.A.B.; Kormos, C. Wilderness and Biodiversity Conservation. **2003**, *100*, 10309–10313.
125. Soria, J.U.; Fernández, J.M. Más Allá del Cambio Climático, Universidad Nacional Autónoma de México Facultad, 2006.
126. Palacio Prieto, J.L. Geosites, Geomorphosites and Geoparks: Importance, Actual Situation and Perspectives in Mexico. *Investig. Geogr.* **2013**, *82*, 24–37, doi:10.14350/rig.32817.
127. Teo, H.C.; Zeng, Y.; Sarira, T.V.; Fung, T.K.; Zheng, Q.; Song, X.P.; Chong, K.Y.; Koh, L.P.

- Global Urban Reforestation Can Be an Important Natural Climate Solution. *Environ. Res. Lett.* **2021**, *16*, 034059, doi:10.1088/1748-9326/abe783.
128. Abbate, S.; Di Paolo, L.; Carapellucci, R.; Cipollone, R. Urban Context and Neighbouring Lands: How Reforestation Could Have a Role in the Implementation of Sustainable Energy and Climate Action Plans. *E3S Web Conf.* **2021**, *312*, 10002, doi:10.1051/e3sconf/202131210002.
  129. Hall, K.D.; Guo, J.; Dore, M.; Chow, C.C. The Progressive Increase of Food Waste in America and Its Environmental Impact. *PLoS One* **2009**, *4*, e7940, doi:10.1371/journal.pone.0007940.
  130. Marzouk, M.; Azab, S. Environmental and Economic Impact Assessment of Construction and Demolition Waste Disposal Using System Dynamics. *Resour. Conserv. Recycl.* **2014**, *82*, 41–49, doi:10.1016/j.resconrec.2013.10.015.
  131. Yilmaz, O.; Kara, B.Y.; Yetis, U. Hazardous Waste Management System Design under Population and Environmental Impact Considerations. *J. Environ. Manage.* **2017**, *203*, 720–731, doi:10.1016/j.jenvman.2016.06.015.
  132. Rahaman, Z.A.; Kafy, A.-Al; Saha, M.; Rahim, A.A.; Almulhim, A.I.; Rahaman, S.N.; Fattah, M.A.; Rahman, M.T.; S, K.; Faisal, A.-A.-; et al. Assessing the Impacts of Vegetation Cover Loss on Surface Temperature, Urban Heat Island and Carbon Emission in Penang City, Malaysia. *Build. Environ.* **2022**, *222*, 109335, doi:10.1016/j.buildenv.2022.109335.
  133. Seto, K.C.; Güneralp, B.; Hutyra, L.R. Global Forecasts of Urban Expansion to 2030 and Direct Impacts on Biodiversity and Carbon Pools. *Proc. Natl. Acad. Sci.* **2012**, *109*, 16083–16088, doi:10.1073/pnas.1211658109.
  134. Shen, W.; Liu, Y.; Yan, B.; Wang, J.; He, P.; Zhou, C.; Huo, X.; Zhang, W.; Xu, G.; Ding, Q. Cement Industry of China: Driving Force, Environment Impact and Sustainable Development. *Renew. Sustain. Energy Rev.* **2017**, *75*, 618–628, doi:10.1016/j.rser.2016.11.033.
  135. Santamaría-Freire, E.J.; López Pérez, S. de los A. Beneficio Social de La Actividad Turística En Ecuador. *Rev. Venez. Gerenc.* **2019**, *24*, 417–428.
  136. Benavides, S. El Sector Turismo: Su Aporte a La Economía. *Econ. y Soc.* **2016**, 111–121.
  137. Gino, R.; Pavón, S.; Del, R.; Serrano Barquín, C.; Del Carmen Mínguez García, M.; Cruz Jiménez, G.; Isabel, J.; Pérez, J. Estrategias de Control de Impactos Turísticos en las Áreas Naturales Protegidas y Zonas Arqueológicas de Quintana Roo, México Control Strategies of Tourism Impact on Natural Areas and Archaeological Zones of Quintana Roo, Mexico. **2013**.
  138. Trivi, N.A. El Paisaje, Del Atractivo Al Fetiche. Un Ensayo Sobre Consumo Visual y Turismo. *PASOS. Rev. Tur. y Patrim. Cult.* **2018**, *16*, 1131–1141, doi:10.25145/j.pasos.2018.16.078.
  139. Rodríguez Cortés, A.B.; Díaz Velasco, A. La Recreación y el Turismo, Una Propuesta de Formación de la Universidad Pedagógica Nacional. *Lúdica Pedagógica* **2014**, *1*, 137–149, doi:10.17227/01214128.19ludica137.149.
  140. Schlüter Vasconcelos, C.; Drummond Câmara, J.B. Evaluación de la Capacidad de Carga Física del Parque Municipal del Itiquira, Formosa (Go), Brasil. *Estud. y Perspect. en Tur.* **2012**, *21*, 996–1012.
  141. Walker, K.; Moscardo, G. Encouraging Sustainability beyond the Tourist Experience: Ecotourism, Interpretation and Values. *J. Sustain. Tour.* **2014**, *22*, 1175–1196, doi:10.1080/09669582.2014.918134.
  142. Navarro, D. Recursos Turísticos y Atractivos Turísticos: Conceptualización, Clasificación y

Valoración. *Cuad. Tur.* **2015**, 335, doi:10.6018/turismo.35.221641.

143. Yu, A.; Wei, Y.; Chen, W.; Peng, N.; Peng, L. Life Cycle Environmental Impacts and Carbon Emissions: A Case Study of Electric and Gasoline Vehicles in China. *Transp. Res. Part D Transp. Environ.* **2018**, 65, 409–420, doi:10.1016/j.trd.2018.09.009.

**Disclaimer/Publisher's Note:** The statements, opinions and data contained in all publications are solely those of the individual author(s) and contributor(s) and not of MDPI and/or the editor(s). MDPI and/or the editor(s) disclaim responsibility for any injury to people or property resulting from any ideas, methods, instructions or products referred to in the content.
